# Supplementary material for: Thiadiazole-functionalized Pb(ii)-MOF for “turn-on” fluorescence selective sensing of Al3+
Source: Royal Society of Chemistry journal article supplement (doi:10.1039/d4ce01233j), 2025-01-01
Supplement: d4ce01233j1.pdf [file d4ce01233j1.pdf]

## ***Electronic supplementary information (ESI)***

### **Thiadiazole-functionalized Pb(II)-MOF for “Turn-on” Fluorescence Selective Sensing of Al<sup>3+</sup>**

Hangchuan Zhang,<sup>a</sup> Jingpeng Guo,<sup>a</sup> Lin Liu,<sup>\*b</sup> Zhan Yu<sup>a</sup> and Na Wei<sup>\*a</sup>

*<sup>a</sup>Institute of Catalysis for Energy and Environment, College of Chemistry and Chemical Engineering, Shenyang Normal University, Shenyang 110034 Liaoning, China. E-mail: wwweina@126.com*

*<sup>b</sup>College of Chemistry, Liaoning University, Shenyang 110036 Liaoning, China. E-mail: liulin@lnu.edu.cn.*

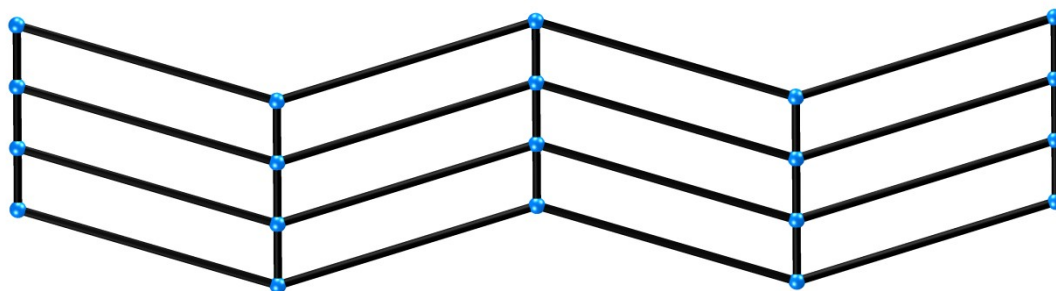

Fig. S1 Schematic representation of the (4,2)-connected net of Pb-BTDB

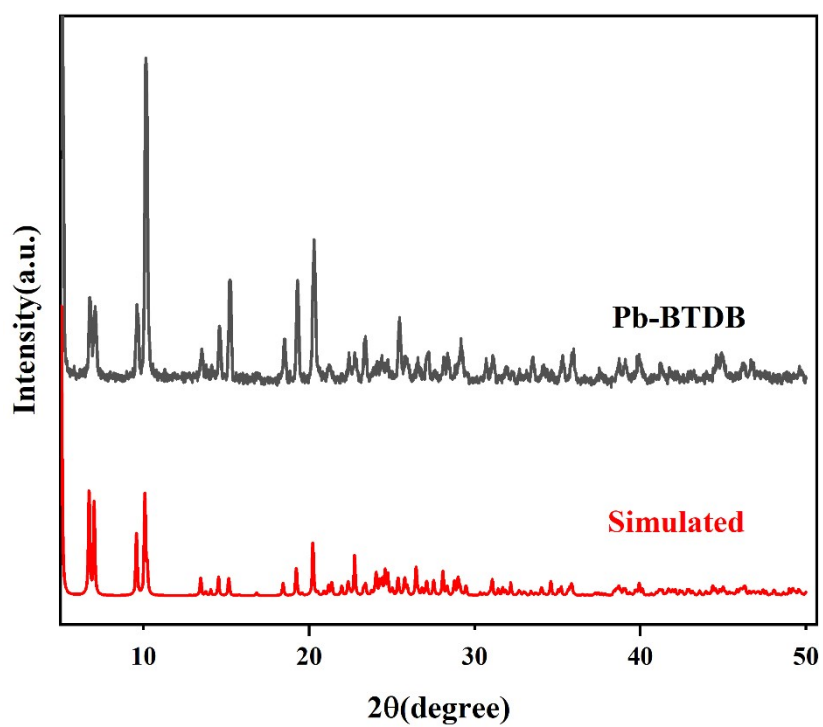

Fig. S2 PXRD pattern of Pb-BTDB

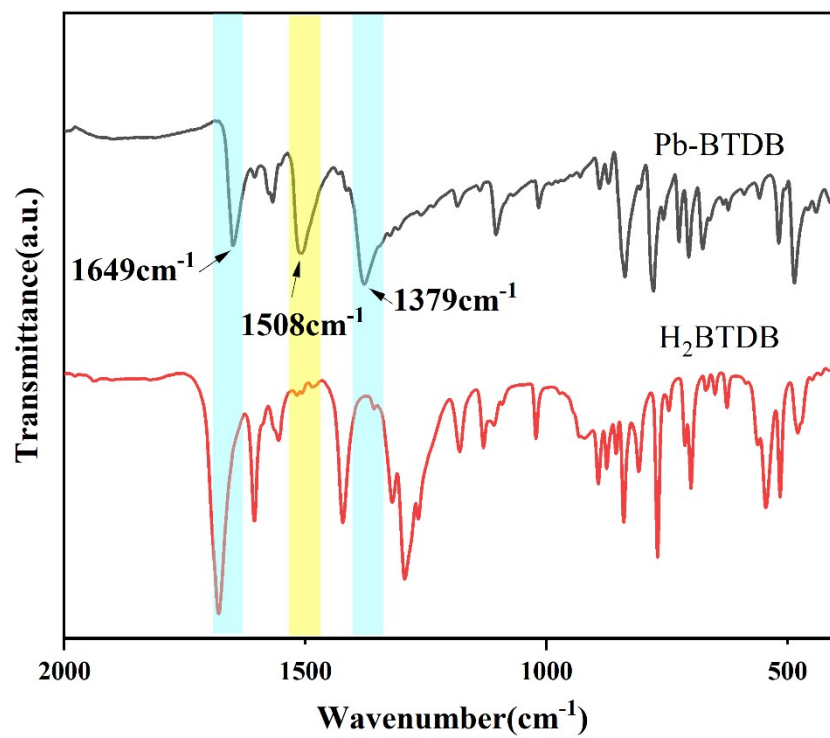

Fig. S3 FT-IR spectra of Pb-BTDB and H<sub>2</sub>BTDB ligand

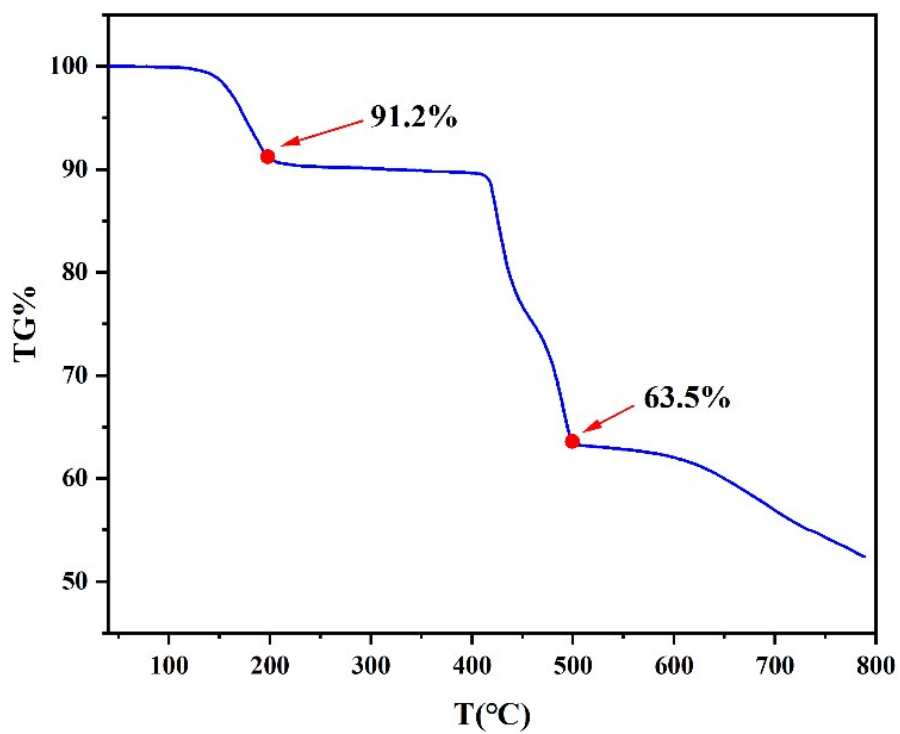

Fig. S4 TGA curve of Pb-BTDB

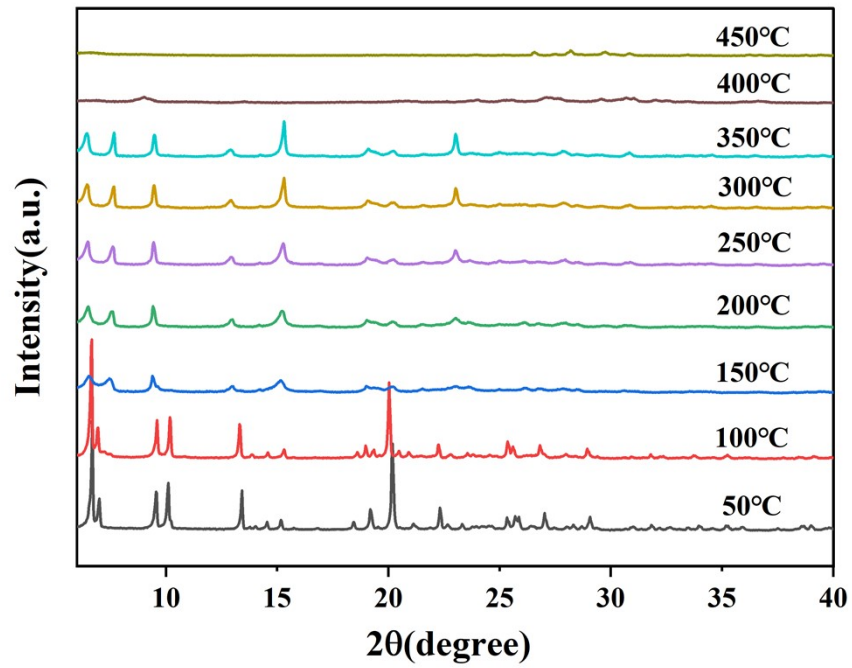

Fig. S5 Variable-temperature PXRD patterns of Pb-BTDB

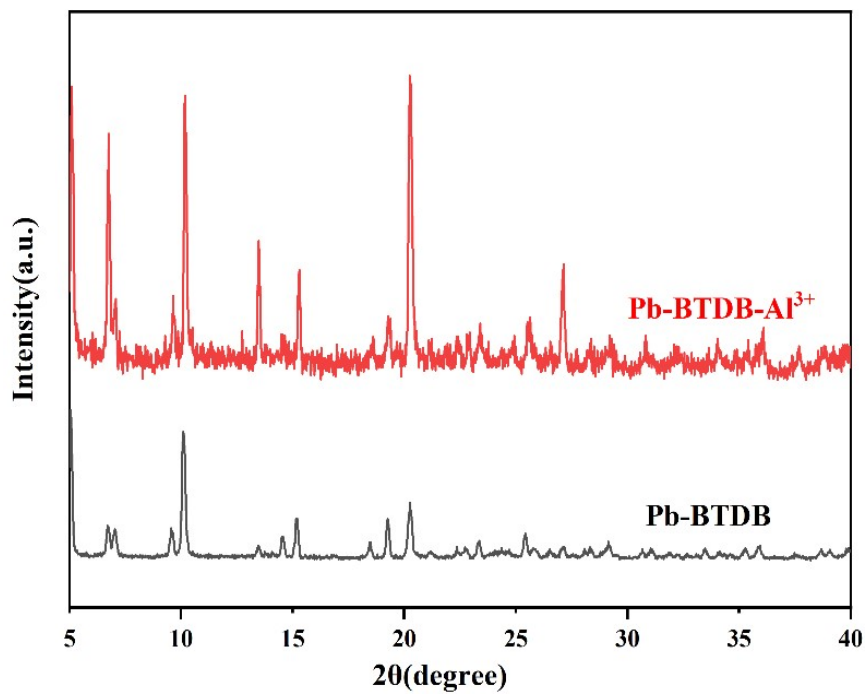

Fig. S6 PXRD patterns of Pb-BTDB before and after treatment with  $\text{Al}^{3+}$

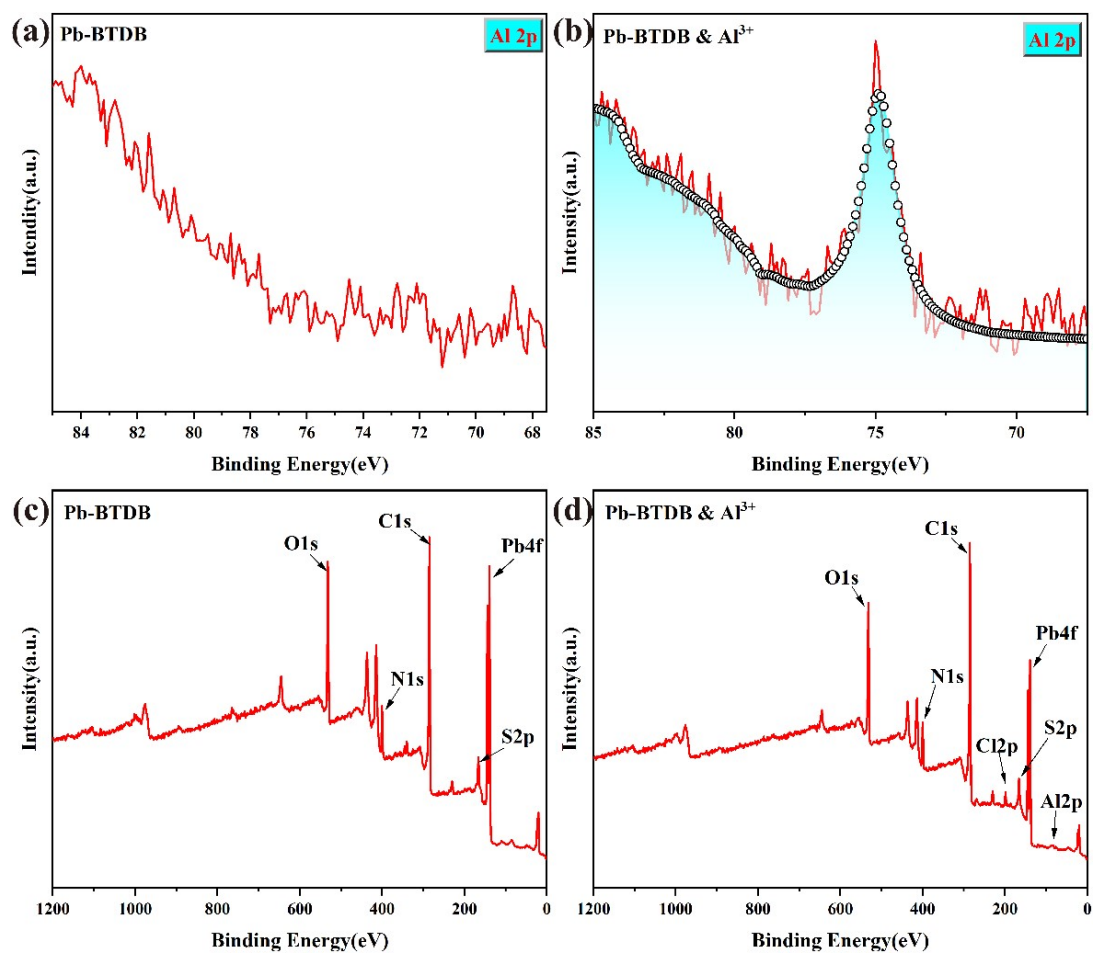

Fig. S7 XPS spectra of Al 2p (a)(b) and survey (c)(d) for Pb-BTDB before and after treatment with  $\text{Al}^{3+}$
